# Supplementary material for: A fluorescent probe based on hydroxylnaphthalene 2-cyanoacrylate: fluoride ion detection and its bio-imaging in live cells
Source: Royal Society of Chemistry journal article supplement (doi:10.1039/c4nj00018h), 2014-01-01
Supplement: c4nj00018h1.pdf [file c4nj00018h1.pdf]

## **Fluorescent Probe based on Hydroxynaphthalene 2-Cyanoacrylate: Fluoride Ions Detection and its Bio-imaging in Live Cell**

Ruiyuan Liu, Ya Gao, Qianbing Zhang, Xiaodong Yang, Xinwei Lu, Zhiyong Ke, Wenqiang Zhou, Jinqing Qu

### Contents

Fig. S1  $^1\text{H}$  NMR spectrum of probe **1** in  $\text{DMSO}-d_6$ . The solvent are marked with asterisks.

Fig. S2  $^{13}\text{C}$  NMR spectrum of probe **1** in  $\text{DMSO}-d_6$ .

Fig. S3 IR spectrum of probe **1**.

Fig. S4 Emission ratio  $I_{490}/I_{450}$  of probe **1** (30  $\mu\text{M}$ ) as a function of  $\text{F}^-$  concentration in the range of 0~10 equiv upon excitation at 388 nm.

Fig. S5 Absorption response of probe **1** (30  $\mu\text{M}$ ) in PBS buffer (pH 7.4, 10 mM, containing 1% DMSO) in the presence of various anions including  $\text{NO}_3^-$ ,  $\text{Br}^-$ ,  $\text{Cl}^-$ ,  $\text{HSO}_4^-$ ,  $\text{CO}_3^{2-}$ ,  $\text{S}^{2-}$ ,  $\text{I}^-$ ,  $\text{N}_3^-$ ,  $\text{PO}_4^-$ ,  $\text{SCN}^-$  and  $\text{CH}_3\text{COO}^-$  (100  $\mu\text{M}$  for each ).

Fig. S6 Fluorescence and Color changes of probe **1** (30  $\mu\text{M}$ ) to various anions in PBS buffer (pH 7.4, 10 mM, containing 1% DMSO) in the presence of various anions. (a) with excitation at 365 nm using UV lamp. (b) without excitation.

Fig. S7 Percentage of viable HeLa and PC3 cells after treatment with indicated concentrations of probe **1** after 24 hours.

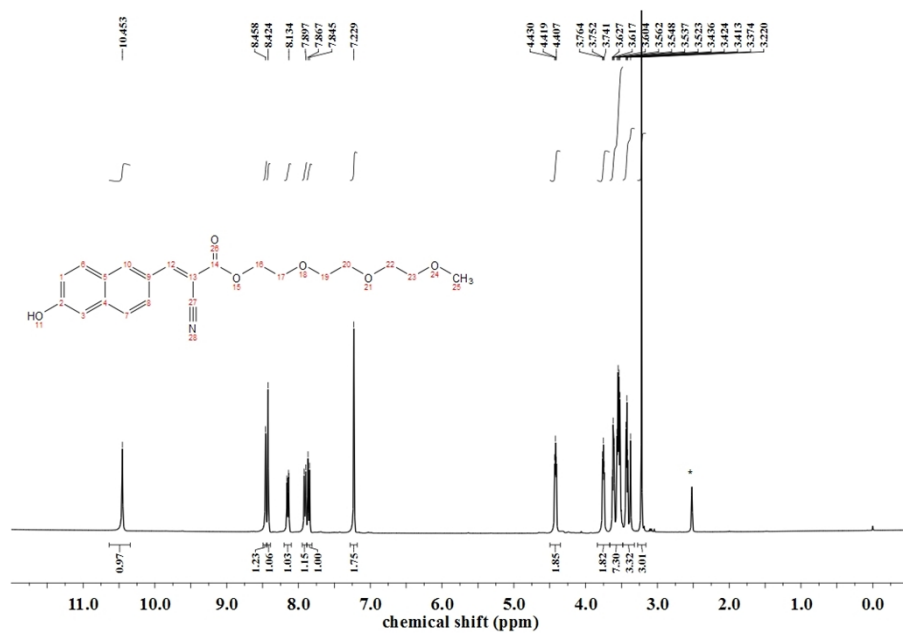

Fig. S1 <sup>1</sup>H NMR spectrum of probe **1** in DMSO-*d*<sub>6</sub>. The solvent are marked with asterisks.

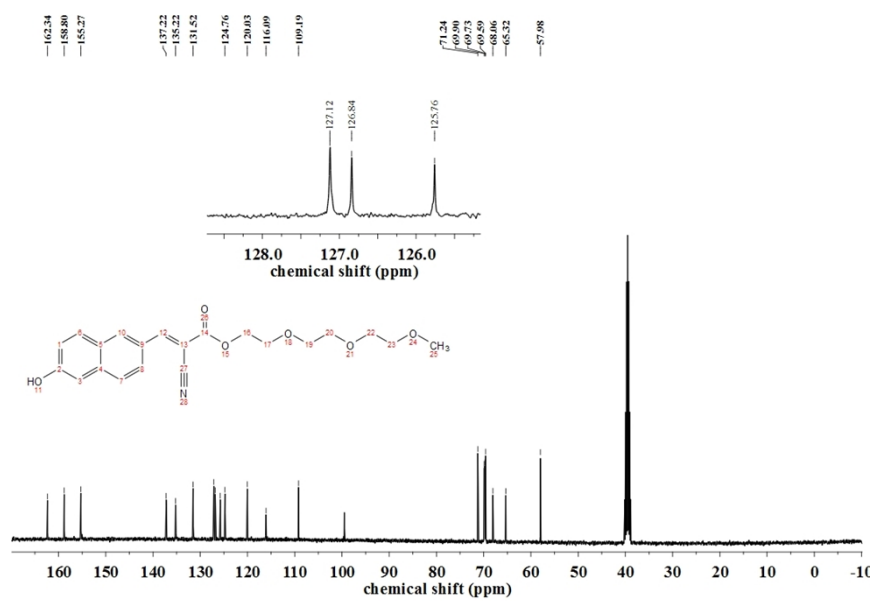

Fig. S2  $^{13}\text{C}$  NMR spectrum of probe **1** in  $\text{DMSO}-d_6$ .

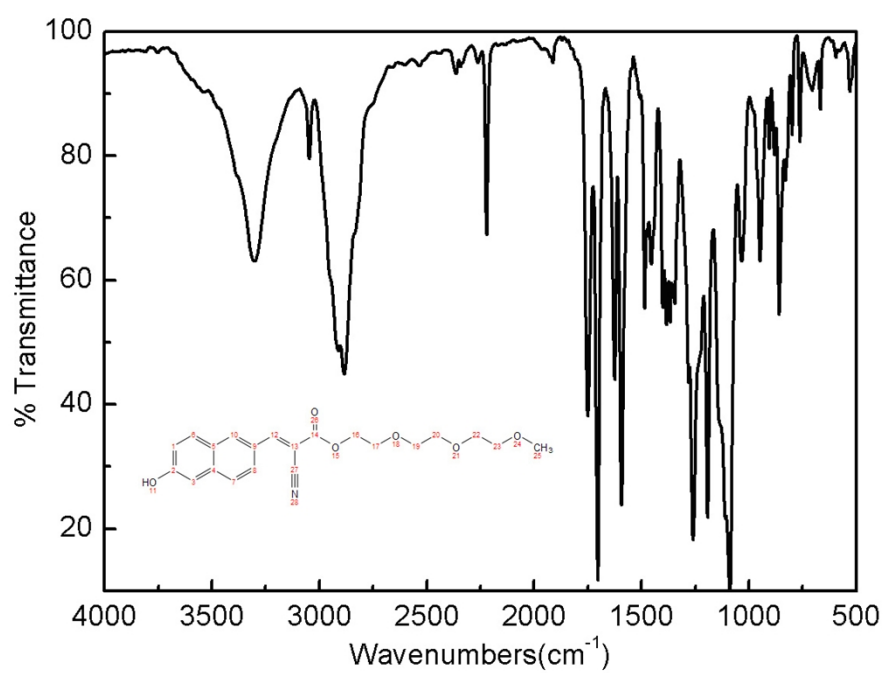

Fig. S3 IR spectrum of probe 1

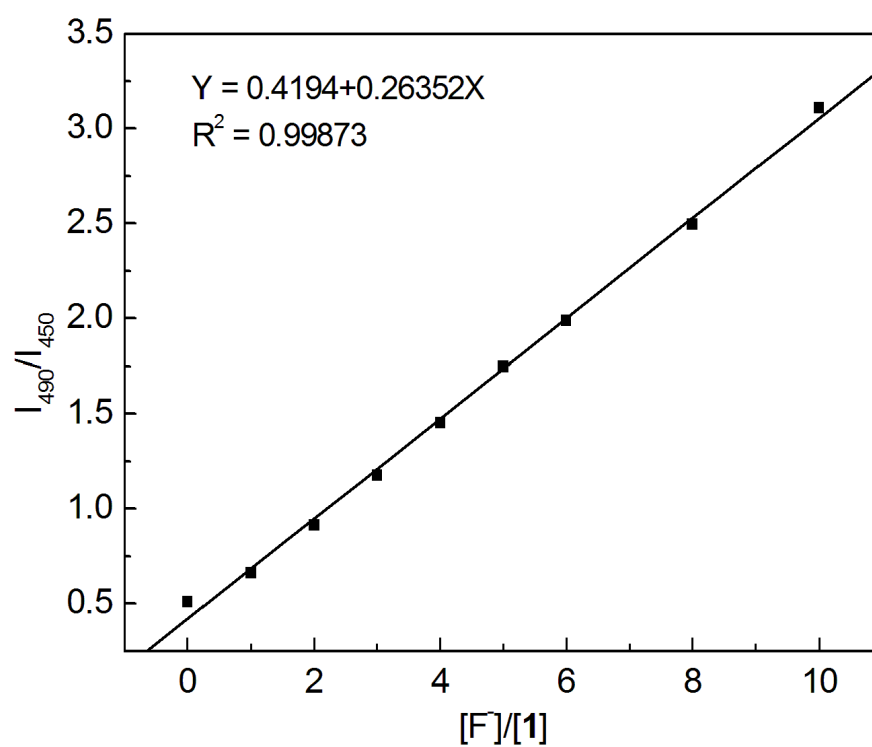

Fig. S4 Emission ratio  $I_{490}/I_{450}$  of probe **1** (30  $\mu\text{M}$ ) as a function of  $F^-$  concentration in the range of 0~10 equiv upon excitation at 388 nm.

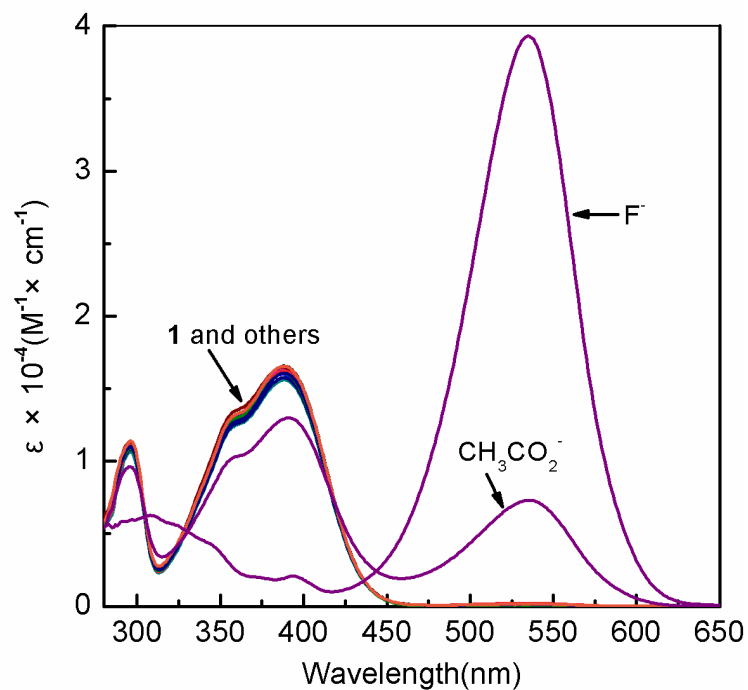

Fig. S5 Absorption response of probe **1** (30 μM) in PBS buffer (pH 7.4, 10 mM, containing 1% DMSO) in the presence of various anions including F<sup>-</sup>, NO<sub>3</sub><sup>-</sup>, Br<sup>-</sup>, Cl<sup>-</sup>, HSO<sub>4</sub><sup>-</sup>, CO<sub>3</sub><sup>2-</sup>, S<sup>2-</sup>, I<sup>-</sup>, N<sub>3</sub><sup>-</sup>, PO<sub>4</sub><sup>-</sup>, SCN<sup>-</sup> and CH<sub>3</sub>COO<sup>-</sup> (100 μM for each ).

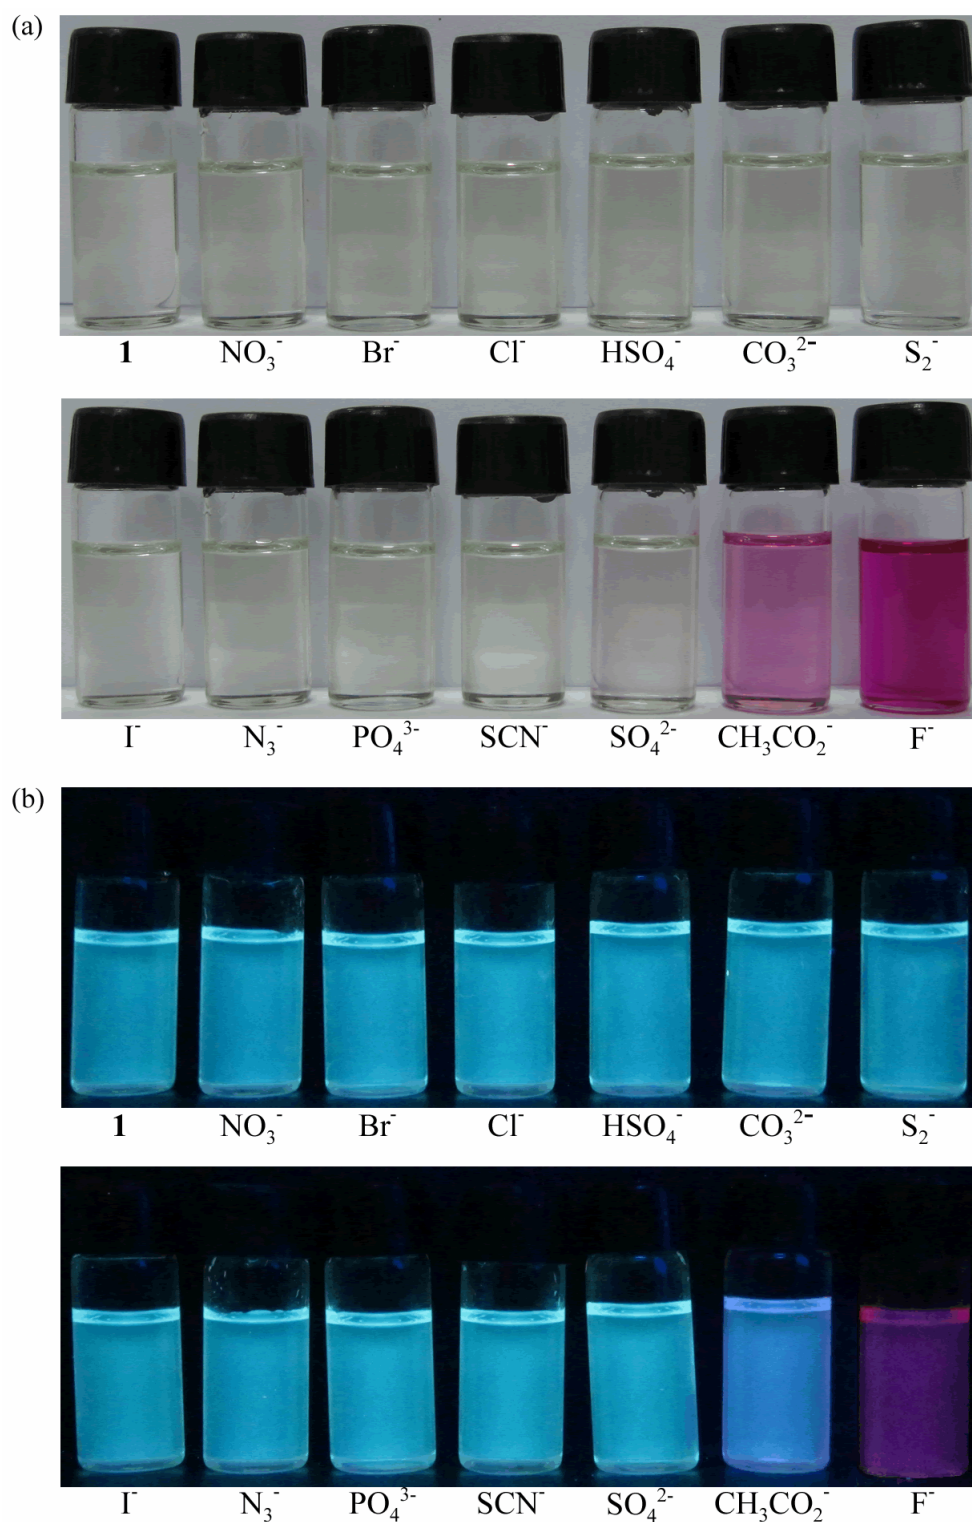

Fig. S6 Fluorescence and Color changes of probe **1** (30  $\mu\text{M}$ ) to various anions in PBS buffer (pH 7.4, 10 mM, containing 1% DMSO) in the presence of various anions ( $[\text{anion}] = 150 \mu\text{M}$ ). (a) with excitation at 365 nm using UV lamp. (b) without excitation.

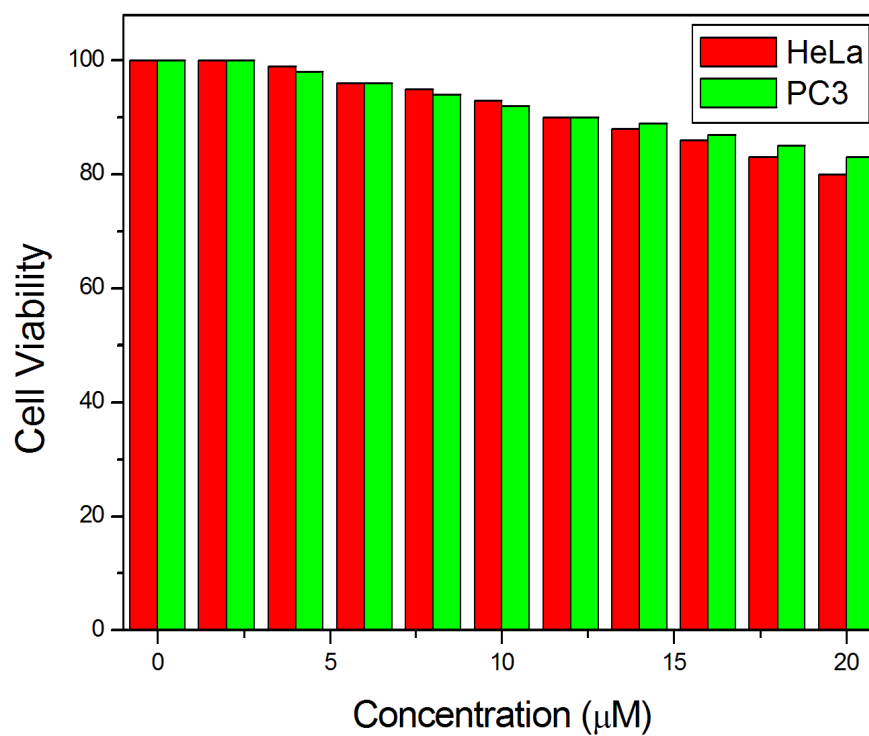

Fig. S7 Percentage of viable HeLa and PC3 cells after treatment with indicated concentrations of probe 1 after 24 hours.
